# Transient expression of *Mnb/Dyrk1a* couples cell cycle exit and differentiation of neuronal precursors by inducing *p27<sup>KIP1</sup>* expression and suppressing NOTCH signaling

Barbara Hämmerle<sup>1</sup>, Edgar Ulin<sup>1</sup>, Jordi Guimera<sup>2</sup>, Walter Becker<sup>3</sup>, François Guillemot<sup>4</sup> and Francisco J. Tejedor<sup>1,\*</sup>

## SUMMARY

The decision of a neural precursor to stop dividing and begin its terminal differentiation at the correct place, and at the right time, is a crucial step in the generation of cell diversity in the nervous system. Here, we show that the Down's syndrome candidate gene (*Mnb/Dyrk1a*) is transiently expressed in prospective neurons of vertebrate CNS neuroepithelia. The gain of function (GoF) of *Mnb/Dyrk1a* induced proliferation arrest. Conversely, its loss of function (LoF) caused over proliferation and cell death. We found that MNB/DYRK1A is both necessary and sufficient to upregulate, at transcriptional level, the expression of the cyclin-dependent kinase inhibitor *p27<sup>KIP1</sup>* in the embryonic chick spinal cord and mouse telencephalon, supporting a regulatory role for MNB/DYRK1A in cell cycle exit of vertebrate CNS neurons. All these actions required the kinase activity of MNB/DYRK1A. We also observed that MNB/DYRK1A is co-expressed with the NOTCH ligand *Delta1* in single neuronal precursors. Furthermore, we found that MNB/DYRK1A suppressed NOTCH signaling, counteracted the pro-proliferative action of the NOTCH intracellular domain (NICD), stimulated *Delta1* expression and was required for the neuronal differentiation induced by the decrease in NOTCH signaling. Nevertheless, although *Mnb/Dyrk1a* GoF led to extensive withdrawal of neuronal precursors from the cell cycle, it was insufficient to elicit their differentiation. Remarkably, a transient (ON/OFF) *Mnb/Dyrk1a* GoF efficiently induced neuronal differentiation. We propose that the transient expression of MNB/DYRK1A in neuronal precursors acts as a binary switch, coupling the end of proliferation and the initiation of neuronal differentiation by upregulating *p27KIP1* expression and suppressing NOTCH signaling.

**KEY WORDS:** Neurogenesis, Neural proliferation, Neuronal differentiation, Down's syndrome, Mouse, Chick

## INTRODUCTION

Cell proliferation, cell specification and cell differentiation must be precisely coordinated during nervous system development in order to ensure that the proper number of the diverse cell types is generated in the correct place and at the right time. Accordingly, the developmental programs that control cell lineage specification must be tightly coordinated with the mechanisms that regulate cell cycle progression and terminal differentiation (reviewed by Pituello, 1997; Hollyday, 2001; Bally-Cuif and Hammerschmidt, 2003; Caviness et al., 2003; Cremisi et al., 2003; Ohnuma and Harris, 2003; Guillemot, 2005; Nguyen et al., 2006a; Guillemot, 2007; Agathocleous and Harris, 2009; Okano and Temple, 2009; Pitto and Cremisi, 2010). Overproliferation or premature differentiation of a given cell type or in a specific brain region will alter the balance in cell number between different populations. Such disequilibria will ultimately affect connectivity and cause malfunctions that can lead to tumorigenesis, neuropathologies and mental disorders.

Down's syndrome (DS; trisomy 21) is the most common genetic cause of mental retardation. Brains of individuals with DS are characterized by their reduced size, decreased neuron density in specific regions, dendritic atrophy and spine dysgenesis (for reviews, see Becker et al., 1991; Coyle et al., 1986). The fact that the neuronal deficit is detected in fetuses and children with DS (Wisniewski et al., 1984; Schmidt-Sidor et al., 1990; Larsen et al., 2008) indicates that this pathology originates through alterations in the processes of neurogenesis during development. Interestingly, several studies have identified alterations in neural proliferation and neurogenesis in the forebrain of fetuses with DS and in trisomic DS mouse models (Chakrabarti et al., 2007; Contestabile et al., 2007; Guidi et al., 2008).

*MNB/DYRK1A* (Minibrain, dual-specificity tyrosine-Y-regulated kinase 1A) is one of the genes harbored within the DS Critical Region (Guimera et al., 1996; Song et al., 1996), the minimal region of Chromosome 21 that, when present in triplicate, generates most DS phenotypes, including the severe mental retardation (Delabar et al., 1993). *Mnb/Dyrk1a* is expressed in mouse brain regions that correspond to those in the human brain that are affected in DS. Moreover, *MNB/DYRK1A* is overexpressed in the brain of fetuses with DS (Guimera et al., 1999). Numerous studies in humans and experimental models have implicated *MNB/DYRK1A* overexpression in developmental, cognitive and neurodegenerative phenotypes of DS (for reviews, see Hämmerle et al., 2003a; Dierssen and de Lagrán, 2006; Tejedor and Hämmerle, 2011; Wegiel et al., 2011). Furthermore, truncation of *MNB/DYRK1A* causes microcephaly in humans (Moeller et al., 2008).

<sup>1</sup>Instituto de Neurociencias, CSIC and Universidad Miguel Hernandez, Alicante 03550, Spain. <sup>2</sup>HMGU-Institute of Developmental Genetics, 85764 Munich, Germany. <sup>3</sup>Institute of Pharmacology and Toxicology, RWTH Aachen University, 52057 Aachen, Germany. <sup>4</sup>Division of Molecular Neurobiology, National Institute for Medical Research, London NW7 1AA, UK.

\*Author for correspondence (f.tejedor@umh.es)

The *Mnb/Dyrk1a* gene encodes a highly conserved protein kinase (Becker et al., 1998; Galceran et al., 2003). Mutations in the orthologous *minibrain* (*mnb*) gene of *Drosophila* reduce adult brain size, particularly in the optic lobes. This is due to altered proliferation in the neuroepithelial primordia of the larval optic lobes (Tejedor et al., 1995). These phenotypes suggest that MNB regulates neural proliferation and neurogenesis. Expression studies performed in the developing chick and mouse CNS predict sequential functions of *Mnb/Dyrk1a* in neural progenitors, nascent neurons and differentiating neurons (Hämmerle et al., 2002; Hämmerle et al., 2003b; Hämmerle et al., 2008). Thus, like *Drosophila* mutants, the brains of *Dyrk1a*<sup>+/-</sup> mice are decreased in size in a region-specific manner (Fotaki et al., 2002). Furthermore, inhibition of the MNB/DYRK1A protein kinase interferes with neurite formation (Göckler et al., 2009), an early process in neuronal differentiation. Together, these findings strongly suggest that *Mnb/Dyrk1a* fulfills several sequential roles in the transition from neural proliferation to neuronal differentiation.

Here, we have used three experimental systems, the prospective spinal cord of the chick, the developing telencephalon in the mouse and cultured PC12 cells, to gain insight into the mechanisms underlying some of these sequential functions fulfilled by MNB/DYRK1A. Interestingly, we found that the transient expression of *Mnb/Dyrk1a* promotes cell cycle exit by upregulating *p27<sup>KIP1</sup>* (*Cdkn1b* – Mouse Genome Informatics) transcription and neuronal differentiation by suppressing NOTCH signaling. We discuss how these activities influence the coordination of neural proliferation and neuronal differentiation during vertebrate CNS development, and their possible implications for DS.

## MATERIALS AND METHODS

### In ovo electroporation of chick embryos

In ovo electroporation of chick embryos was performed essentially as described previously (Hämmerle and Tejedor, 2007), varying only the embryonic stage and the area of the neural tube under study. In brief, cDNAs containing the full coding sequence of *Mnb/Dyrk1a* (accession number NM\_101395), *Mnb/Dyrk1a*(K188R) (a dead kinase mutant) (Wiechmann et al., 2003), *cDelta-1* (accession number NM\_204973) or a truncated version (*Delta<sup>DN</sup>*) lacking all but 13 amino acids in the intracellular region (Henrique et al., 1997; Chitnis et al., 1995), were cloned into pCIG, a bicistronic vector that co-expresses nuclear GFP (Megason and McMahon, 2002). The intracellular domain of NOTCH (NICD) was cloned into the pEVRF vector (Matthias et al., 1989) and, in this case, the plasmid was co-transfected with the GFP containing EGFPN1 vector (Clontech).

Normal fertilized chicken eggs (*Gallus domesticus*) were incubated at 38°C until they had reached HH stage 11–12 (Hamburger and Hamilton, 1951). Plasmid DNA (1–3 µg/µl) was injected into the neural tube and two platinum electrodes were placed in parallel on either side of the neural tube at a distance of 4 mm, at the level of most rostral part of the prospective spinal cord. Five consecutive pulses (40–50 V/50 ms) were then applied to the embryos using an Intrasept TSS10 pulse stimulator (Intracell). DNA concentration and pulse voltage were adjusted in function of the desired transfection efficiency. After electroporation, embryos were incubated at 38°C. Transfection efficiency was tested by in vivo observation of GFP fluorescence under a stereomicroscope. After an adequate incubation period, the embryos were either labeled with BrdU, and/or fixed and processed for immunocytochemistry or fluorescent in situ hybridization as described below.

### Ex vivo electroporation of mouse embryos

Mice (Parkes strain) were housed, bred and treated according to the guidelines approved by the Home Office under the Animals (Scientific procedures) Act 1986. Wild-type embryos were obtained from timed matings. Ex vivo electroporation of E14.5 mouse embryos was performed essentially as described previously (Nguyen et al., 2006b). DNA (2 µg/µl) mixed with 0.05% Fast Green (Sigma) was injected into the telencephalic

vesicle, and five electrical pulses (50V/50ms) were then applied at 1-second intervals using 5 mm platinum tweezers electrodes (CUI650P5, Nepagene) and an ECM-830 BTX square wave electroporator (BTX, Genetric). Following electroporation, the brains were dissected out in L15 (Invitrogen) and transferred into liquid 3% low melting agarose (Sigma) at 38°C. After embedding, coronal brain vibratome (250 µm) sections were obtained, and they were transferred onto sterile culture plate inserts (0.4 µm pore size; Millicell-CM, Millipore) and cultured for 24 hours in semi-dry conditions in wells containing supplemented Neurobasal medium. After fixation and cryoprotection, they were embedded in OCT Compound (VWR) and sectioned coronally (10 µm) on a cryostat. For GoF experiments, we used a full-length *MNB/DYRK1A* cDNA (Guimerá et al., 1996) inserted into the pCIG-vector. For LoF experiments, we transfected a short Silencer Pre-designed siRNA (Ambion) containing the following 5'-3' Sequence: sense strand GGAUGUAUCUUGGUUGAAAt, antisense strand UUUAACCAAGAUACAUCaa along with pCIG plasmid. As negative controls, samples were transfected with Silencer Select Negative Control siRNAs (Ambion) and no apparent effects were observed.

The efficiency of the *Mnb/Dyrk1a* constructs and siRNA to modify *Mnb/Dyrk1a* expression was tested by fluorescent in situ hybridization after transfection of chick and mouse embryos (see Fig. S1 in the supplementary material).

### In situ hybridization and immunocytochemistry

Chicken embryos were fixed in 4% paraformaldehyde for 3 hours at room temperature. Whole-mount fluorescent in situ hybridization with RNA probes for *cDelta* and *cHes5* was performed essentially as described previously (Hämmerle and Tejedor, 2007). To detect the probes, an anti-digoxigenin-POD antibody (Roche Molecular Biochemicals) was used in combination with the TSA Plus Fluorescence System (Perkin Elmer). For in situ hybridization of chick *p27<sup>KIP1</sup>*, two DIG labeled probes corresponding to positions 660–929 and 942–1232 of the cDNA sequence (Accession NM\_204256) were synthesized by PCR. Dual fluorescent in situ hybridization for chick *Mnb/Dyrk1a* and *Delta1* was performed with DIG- and fluorescein-labeled DNA probes (Hämmerle et al., 2002; Hämmerle and Tejedor, 2007), which were detected using a monoclonal anti-digoxigenin antibody (Roche Molecular Biochemicals) in combination with an anti-mouse-Cy3, and with a goat biotin-conjugated anti-fluorescein antibody (Vector Labs) along with Streptavidin Cy2. Appropriate negative controls without either probe but using all the antisera were run in parallel.

For mouse embryos, fluorescent in situ hybridization was carried out in forebrain cryosections as described previously (Sitz et al., 2008), using mouse *Mnb/Dyrk1a* (Hämmerle et al., 2008; Sitz et al., 2008) and mouse *Hes5* (Akazawa et al., 1992) RNA probes.

The conditions were optimized for the use of the antisera against GFP (Invitrogen), phosphorylated-histone H3 (PH3: Upstate Biotechnology), p27KIP1 (clone 57: BD-Transduction Laboratories), neuronal class III β-tubulin (TUBJ1: Covance) and activated caspase 3 (Cell Signaling Technology). The Cy2-, Cy3- and Cy5-conjugated secondary antibodies were used as recommended by the supplier (Jackson Immunochemicals). Counterstaining of nuclei was performed with DAPI.

### BrdU labeling

Proliferating cells were detected in chick embryos by in ovo incorporation of BrdU as described previously (Hämmerle et al., 2002). Accordingly, 50 µl of a 5 mg/ml solution of BrdU in PBS were applied to the top of the embryo after opening a window in the eggshell. After incubation for 1 hour, the embryos were fixed as described above and cells that had incorporated BrdU were labeled in 40 µm vibratome sections with an antibody against BrdU (Becton Dickinson) and a Cy3-conjugated secondary antibody. Nuclei were visualized with DAPI. Images were acquired on a Leica TCS-SL spectral confocal microscope.

### Whole-mount chicken embryo culture and MNB/DYRK1A kinase inhibition

Whole-mount chick embryos were cultured as described previously (Hämmerle and Tejedor, 2002). Briefly, after removing the embryos from the yolk and separating them from the area pellucida, they were immediately transferred into the culture chamber where they were

incubated in supplemented neurobasal medium at 38°C with permanent oxygenation. Harmine and Epigallocatechin gallate (EGCG) treatments were performed by adding each drug to the culture medium at a final concentration of 2–5 and 20  $\mu$ M, respectively, or equivalent volumes of the vehicle solutions to control embryos.

#### Phenotype and statistical analysis of transfected embryos

Each experiment was performed at least twice. For each series of experiments, the corresponding phenotype was assessed in a minimum of five transfected (or drug treated) embryos that were sectioned by vibratome and processed for immunohistological analysis. The cells labeled by the different markers (BrdU, PH3, p27KIP1, etc.) were counted in serial confocal sections in a minimum of five randomly selected vibratome sections taken from the area of interest from four or five embryos (in most experiments), although only three embryos were required in some experiments showing a highly penetrant phenotype to obtain significant data. The mean proportion of cells expressing specific markers was obtained and the error was calculated as the standard deviation. The statistical significance (*P* value) between experimental and control samples was determined using the double sided, unpaired Student's *t*-test.

#### Transient (ON/OFF) MNB/DYRK1A GoF in PC12 cells

PC12 cells were plated on poly-D-lysine coated coverslips in 24-well plates at a density of  $26 \times 10^4$  cells/ml. The cells were transfected with 0.2  $\mu$ g DNA/well of either the pCIG-MNB/DYRK1A plasmid (experiment) or the empty pCIG vector (control). Transient transfections were carried out with a combination of lipofection (Fugene HD, Roche) and Magnet Assisted Transfection (MA Lipofection Enhancer, Stratech) methods. Harmine was added at a final concentration of 2  $\mu$ M, either immediately or 24 hours after transfection, and the cells were cultured for an additional 48-hour period. GFP- and TUJ1-labeled cells were counted in a minimum of three dishes.

## RESULTS

### Gain and loss-of-function of *Mnb/Dyrk1a* affects proliferation in the chick spinal cord

The influence of *Mnb/Dyrk1a* on the transition from neural proliferation to neuronal differentiation during vertebrate development was examined by studying the effects of its loss of function (LoF) and gain of function (GoF) in the prospective spinal cord of chick embryos. Owing to the well-defined rostrocaudal gradient of neurogenesis, there is a gradual separation of the cellular processes of proliferation and neurogenesis along the rostrocaudal axis of this tissue (for reviews, see Ericson et al., 1992; Hollyday, 2001; Diez del Corral and Storey, 2004). We focused on the rostral part of the developing spinal cord in HH12 embryos, between the first and fifth somite pair (a region that will be referred to as the neurogenic zone, NZ) where neurons are being generated (see Table S1 in the supplementary material for a summary of experimental results).

We first tested the effects of transfecting either pCIG-MNB/Dyrk1a or the empty pCIG vector (control) on the incorporation of BrdU in this area of the neural tube. Ectopic expression of MNB/DYRK1A induced a strong decrease in the number of BrdU-labeled cells 18 hours after transfection (9% versus 34% in control transfected embryos: Fig. 1A–C). Similarly, transfection with *Mnb/Dyrk1a* induced a significant reduction in the mitotic cells labeled with phosphorylated Histone 3 (PH3) (0.8% versus 2.7% in controls: Fig. 1D–F). Therefore, we concluded that *Mnb/Dyrk1a* GoF inhibits the proliferation of neuronal progenitors.

In order to determine whether this antiproliferative effect was caused by the kinase activity of MNB/DYRK1A, we carried out similar electroporation of chick embryos with a MNB/DYRK1A(K188R) kinase dead mutant construct (Wiechmann et al., 2003). We found that this mutant kinase does

not alter proliferation, as assayed by BrdU labeling (see Fig. S2 in the supplementary material), indicating that the antiproliferative effect of the *Mnb/Dyrk1a* GoF is kinase dependent, as formerly tested in other systems (Funakoshi et al., 2003; Yabut et al., 2010).

*Mnb/Dyrk1a* LoF experiments in the chick spinal cord were performed using two specific MNB/DYRK1A kinase inhibitors: harmine (Bain et al., 2007; Sitz et al., 2008; Göckler et al., 2009) and EGCG (Bain et al., 2003; Adayev et al., 2006; Guedj et al., 2009) (for a review, see Becker and Sippl, 2011). Culturing chick embryos for 4 hours in the presence of harmine resulted in a strong increase in BrdU incorporation in the NZ (76% versus 52% in untreated embryos: Fig. 1G–I). The same treatment also resulted in an increase in the number of mitotic cells (not shown). EGCG produced comparative results to harmine (Fig. 1I). Thus, the *Mnb/Dyrk1a* LoF augmented the number of proliferating cells, suggesting that neuronal precursors with decreased MNB/DYRK1A kinase activity were unable to withdraw from the cell cycle.

As altered cell proliferation can lead to apoptosis of neural cells (Becker and Bonni, 2004), we tested the incidence of apoptotic cell death in the chick spinal cord after *Mnb/Dyrk1a* LoF and GoF using activated caspase 3 as a marker. Reducing MNB/DYRK1A kinase activity with harmine or EGCG resulted in an important increase of apoptosis in the NZ (Fig. 1J–L), whereas the expression of MNB/DYRK1A or MNB/DYRK1A(K188R) did not alter the incidence of apoptosis in the NZ (see Fig. S3 in the supplementary material).

### MNB/DYRK1A regulates *p27<sup>KIP1</sup>* expression in embryonic vertebrate neuroepithelia

The effects of *Mnb/Dyrk1a* GoF and LoF on proliferation could reflect its involvement in the regulation of cell cycle exit of neurons. Thus, we analyzed the relationship of MNB/DYRK1A with cyclin-dependent kinase inhibitors (CKIs), the main negative effectors of the cell cycle. In particular, we focused our analysis on p27KIP1, a member of the Cip/Kip family of CKIs that plays an important role in regulating cell cycle exit in the vertebrate CNS (Sherr and Roberts, 1999; Nguyen et al., 2006a), as we have previously observed extensive co-expression with MNB/DYRK1A in the ventricular zone (VZ) of embryonic mouse, where neurons are born (Hämmerle et al., 2008). We initially tested the possible alterations of p27KIP1 expression in the chick spinal cord, where its ectopic expression has been previously found to induce cell cycle arrest of neural progenitors (Gui et al., 2007). We found that the ectopic expression of *Mnb/Dyrk1a* in the NZ resulted in a strong increase in the proportion of cells expressing p27KIP1 as early as 12 hours after transfection (see Fig. S4A in the supplementary material), although at 18 hours it reaches its maximum induction (44% versus 13% in controls: Fig. 2A,B,O). This is a very rapid response if we consider that *Mnb/Dyrk1a* expression is first detected by fluorescent in situ hybridization 8 hours after transfection (not shown). Conversely, culturing chick embryos for 6 hours in the presence of harmine significantly reduced the ratio of p27KIP1-positive cells in the NZ (Fig. 2G,H,P). This action of MNB/DYRK1A on *p27<sup>KIP1</sup>* expression seems to happen at the transcriptional level as the GoF of *Mnb/Dyrk1a* induced an increase in the number of *p27<sup>KIP1</sup>* mRNA-expressing cells 12 hours after transfection, as detected by in situ hybridization (Fig. 2C,D). Conversely, harmine induced a substantial decrease in the number of *p27<sup>KIP1</sup>* mRNA-expressing cells (Fig. 2E,F).

To explore whether these findings in the chicken spinal cord also apply to other vertebrate neuroepithelia, we performed a similar analysis in the embryonic mouse telencephalon where

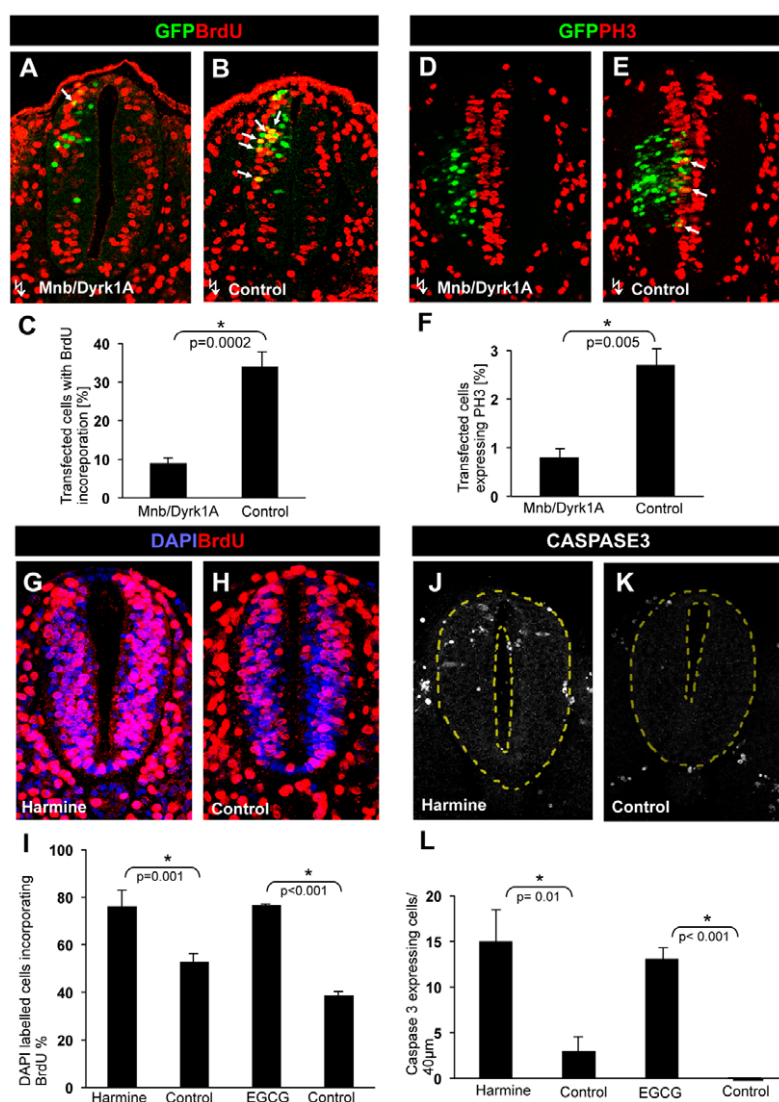

**Fig. 1. Effect of the gain and loss of MNB/DYRK1A function on cell proliferation in the chick spinal cord.**

All images were collected from transverse vibratome sections taken at the level of the rostral spinal cord (NZ) of HH13-16 chick embryos. (A,B) Single confocal sections of embryos transfected with pCIG-*Mnb/Dyrk1a* or pCIG (controls), and immunostained for BrdU and GFP. Arrows indicate BrdU/GFP double-labeled cells. (D,E) Confocal projections (50 µm) of embryos transfected as above showing immunolabeling for PH3 and GFP. Arrows indicate PH3/GFP double-labeled cells. (G,H,J,K) Confocal projections (9 µm) of embryos cultured in the presence or absence (controls) of harmine (as indicated) showing BrdU (G,H) and activated caspase 3 (J,K) immunostaining. Nuclei were counterstained with DAPI. (C,F,I,L) Statistical analysis of the experiments as indicated. Data are mean±s.e.m.

p27KIP1 is thought to be the main CKI (Nguyen et al., 2006a). Forebrains of E14.5 embryos were electroporated ex vivo with either pCIG-*Mnb/Dyrk1a*, pCIG or *Mnb/Dyrk1a* siRNAs + pCIG, and then left in culture. In the case of *Mnb/Dyrk1a* GoF, we observed a strong increase in the number of transfected cells expressing p27KIP1 when compared with the controls (44% vs 21%; Fig. 2I-L,Q). Conversely, transfecting *Mnb/Dyrk1a* siRNAs produced a significant decrease in the proportion of p27KIP1 positive cells (13%; Fig. 2K-N,Q). Thus, MNB/DYRK1A seems to be necessary and sufficient to upregulate the expression of *p27KIP1* in both the chick spinal cord and in the mouse telencephalon. These findings support a role of MNB/DYRK1A in regulating cell cycle exit of vertebrate neurons during CNS development.

### ***Mnb/Dyrk1a* co-expresses with *Delta1* and inhibits NOTCH signaling in neurogenic vertebrate neuroepithelia**

Given its role in promoting the cell cycle exit of neurons, we wondered whether MNB/DYRK1A might also be involved in the initiation of neuronal differentiation. Accordingly, we explored the possible interaction of MNB/DYRK1A with signaling pathways that control neuronal differentiation.

There is compelling evidence that NOTCH-mediated lateral inhibition is involved in the regulation of neuronal differentiation in the vertebrate CNS (for reviews, see Lewis, 1998; Yoon and Gaiano, 2005; Louvi and Artavanis-Tsakonas, 2006; Kageyama et al., 2009). Following the upregulation of *Delta1* expression in individual cells, DELTA1 binds to NOTCH in neighboring cells, which leads to the cleavage of the intracellular domain of NOTCH (NICD) and its translocation to the nucleus. In the nucleus, NICD upregulates the expression of *Hes* family transcription factors, leading to the maintenance of proliferation and the inhibition of *Delta1* expression. The downregulation of *Delta1* provides a feedback to the neighboring cells to decrease NOTCH signaling in the *Delta1*-expressing cell. Thus, the NOTCH-activated cells remain as progenitors while the *Delta1*-expressing cell that has diminished NOTCH activity differentiates into a neuron.

We previously reported that *Mnb/Dyrk1a* mRNA is expressed in single scattered progenitor cells in the so-called proliferation to neurogenesis transition zone (PNTZ) of the prospective chick spinal cord prior to neurogenesis (approximately at the level of the fourth to seventh somitic pairs in HH10 embryos) (Hämmele et al., 2002). Nevertheless, as we have observed before (Hämmele et al., 2002) and show here in more detail in Fig. 3A,

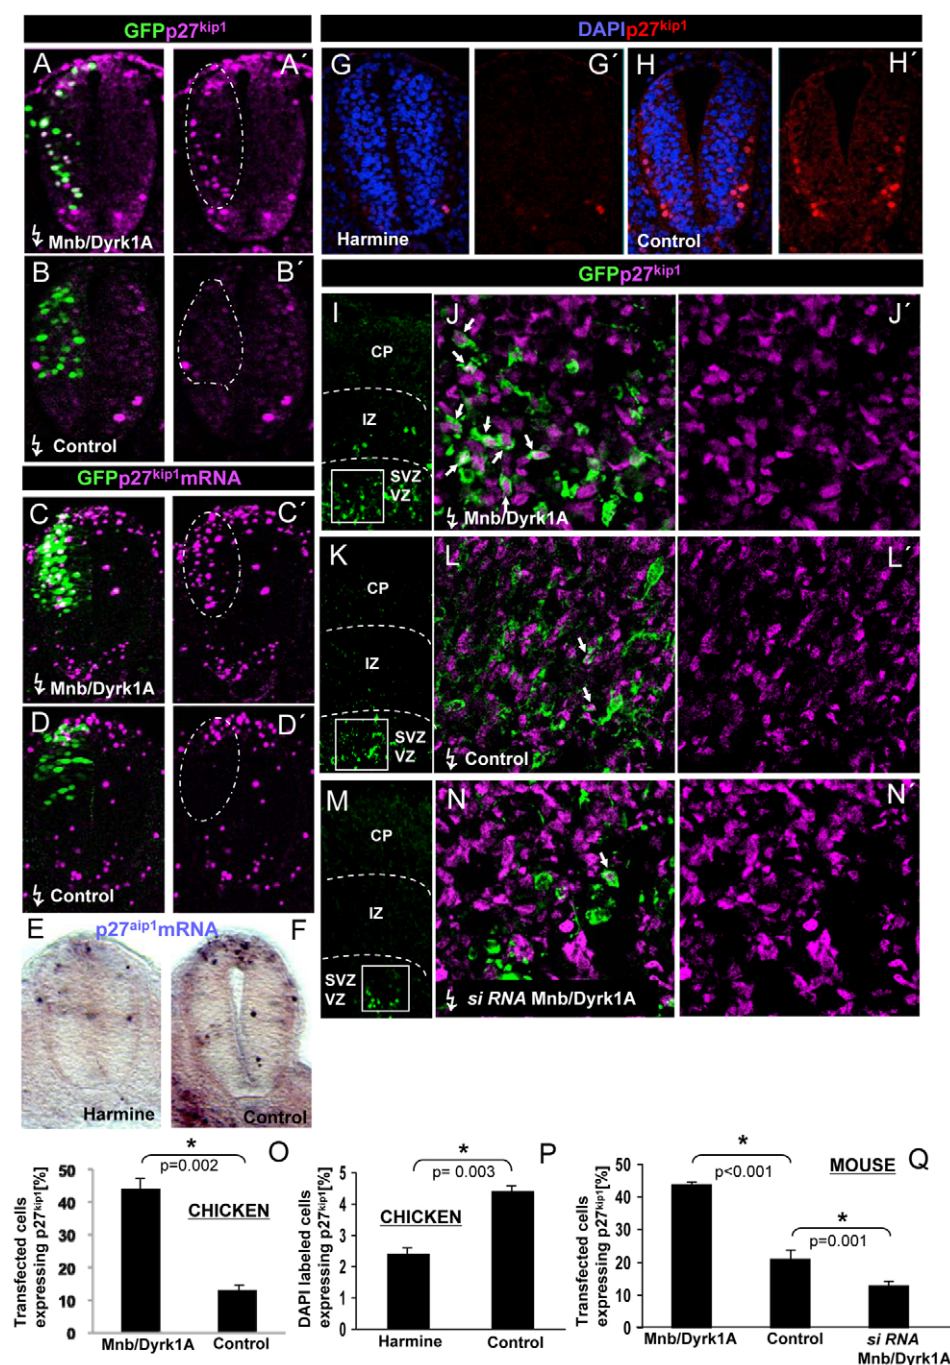

**Fig. 2. Effects of loss and gain of MNB/DYRK1A function on p27KIP1 expression in the chick spinal cord and mouse telencephalon.** (A-D') All images were collected from transverse vibratome sections taken at the level of the rostral spinal cord (NZ) of HH13-16 chick embryos. (A-B') Confocal projections (10  $\mu$ m) of embryos transfected with pCIG-Mnb/Dyrk1a or pCIG (controls), and immunolabeled for p27KIP1 and GFP 18 hours after electroporation. Note the appearance of p27KIP1-positive cells in the transfected zone (outlined) in A. (C-D') Confocal projections (15  $\mu$ m) of embryos transfected with pCIG-Mnb/Dyrk1a or pCIG (controls), and immunolabeled for GFP after fluorescent in situ hybridization for p27KIP1, 12 hours after electroporation. (E-H') Embryos cultured in the presence or absence (controls) of harmine for 6 hours and analyzed for the expression of p27KIP1 mRNA by in situ hybridization (E,F) or for protein (G-H'). Note the decrease in the number of p27KIP1-positive cells in harmine-treated embryos. (I,K,M) Coronal confocal sections showing GFP-positive cells at the frontal area of developing cerebral cortex of E14.5 embryos electroporated with pCIG-Mnb/Dyrk1a (Mnb/Dyrk1a GoF), pCIG (control) or Mnb/Dyrk1a siRNA + pCIG (Mnb/Dyrk1a LoF) and cultured afterwards for 24 hours. (J,J',L,L',N,N') High-magnification images taken from the VZ in the boxed areas indicated in I,K,M showing p27KIP1 and GFP immunolabeling. Double GFP/p27KIP1-labeled cells are indicated with arrows. CP, cortical plate; IZ, intermediate zone; SVZ, sub-ventricular zone; VZ, ventricular zone. (O-Q) Statistical analysis of the experiments as indicated. Data are mean  $\pm$  s.e.m.

there are also single scattered *Mnb/Dyrk1a*-expressing cells in the NZ (around the 1st-2nd somite pairs) and, interestingly, more than 80% of these cells co-express mRNA encoding the NOTCH ligand *Delta1* (Fig. 3B).

According to the DELTA-NOTCH model of lateral inhibition, the co-expression of *Mnb/Dyrk1a* with *Delta1* in individual scattered cells of the NZ strongly suggests that it is transiently expressed in prospective neurons. As it has been recently reported that *Mnb/Dyrk1a* GoF attenuates NOTCH signaling (Fernandez-Martinez et al., 2009), we wondered whether *Mnb/Dyrk1a* could somehow be involved in the suppression of NOTCH signaling during neurogenesis. If this were the case, the ectopic expression of *Mnb/Dyrk1a* in the NZ should suppress in a cell-autonomous manner the expression of *Hes5*, a mediator of NOTCH signaling

in the spinal cord at this stage (Fior and Henrique, 2005; Hämmerle and Tejedor, 2007). Indeed, 15 hours after transfection with pCIG-Mnb/Dyrk1a, we observed a strong decrease in the proportion of *Hes5*-expressing cells (5% versus 42% in pCIG transfected controls: Fig. 3C,D,G). Furthermore, MNB/DYRK1A induced a significant increase of *Delta1*-expressing cells (14% versus 7% in controls: Fig. 3E,F,H).

To determine whether *Mnb/Dyrk1a* could also suppress NOTCH signaling in other vertebrate neuroepithelia, we studied the effects of *Mnb/Dyrk1a* GoF in the embryonic mouse telencephalon by ex vivo electroporation. As in the chick spinal cord, the ectopic expression of *Mnb/Dyrk1a* led to a pronounced decrease in *Hes5* expression in the VZ (Fig. 4A-D), whereas transfection of mouse embryos with *Mnb/Dyrk1a* siRNAs produced an increase in *Hes5*

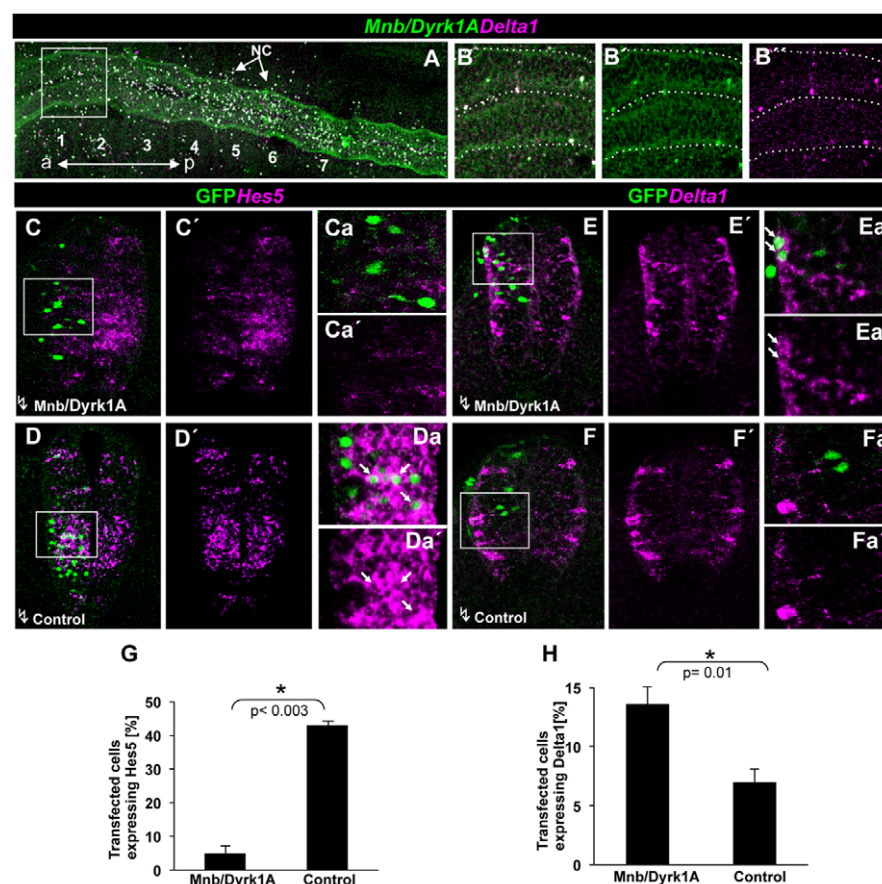

**Fig. 3. Effect of MNB/DYRK1A on DELTA-NOTCH signaling.** (A) Confocal projection of the prospective spinal cord of a HH10 whole-mount chick embryo (dorsal view) showing double fluorescent in situ hybridization labeling of *Mnb/Dyrk1a* and *Delta1* in the neural tube, as well as some in migrating neural crest (NC) cells (arrows). (B-B'') Single confocal image at higher magnification of the boxed region at the level of somites 1-2 showing cellular co-labeling in the rostral spinal cord. (C-F'') Confocal projections (10 μm) of HH15-16 chick embryos transfected with pCIG-Mnb/Dyrk1a or pCIG (controls) showing fluorescent in situ hybridization labeling for either HES5 or DELTA1 and GFP immunolabeling 15 hours after electroporation. (Ca-Fa'') Single confocal image at higher magnification of the boxed regions showing double-labeled cells (arrows). (G,H) Statistical analysis of the corresponding experiments as indicated. Data are mean ± s.e.m.

expression (Fig. 4C-F). Together, these findings strongly suggest that *Mnb/Dyrk1a* suppresses NOTCH signaling during vertebrate CNS neurogenesis.

### Interaction of MNB/DYRK1A with NOTCH signaling in neural proliferation and neuronal differentiation

In order to gain insight into the mechanism by which *Mnb/Dyrk1a* suppresses NOTCH signaling during neurogenesis, we investigated whether MNB/DYRK1A acts upstream or downstream of NICD, as it has been reported that MNB/DYRK1A phosphorylates the NICD in cell lines (Fernandez-Martinez et al., 2009). To this end, we transfected embryonic chick spinal cord cells with *Mnb/Dyrk1a* + NICD or NICD alone, and we analyzed the capacity of the transfected cells to proliferate. As mentioned previously, NOTCH signaling serves to maintain neural progenitors in a state of proliferation, thereby suppressing neurogenesis, whereas, as shown here, the expression of MNB/DYRK1A promotes cell cycle exit of neuronal precursors. If MNB/DYRK1A were to act upstream of NICD, it should not inhibit proliferation in the presence of exogenous NICD, whereas if it acts downstream, it should be able to suppress proliferation even in the presence of NICD. Not only did MNB/DYRK1A suppress BrdU incorporation in the presence of NICD (Fig. 5A-C: 15% versus 38%) but MNB/DYRK1A was sufficient to revert the inhibitory effect that NICD exerted on the expression of p27KIP1 (Fig. 5D-F: 39% of MNB/DYRK1A + NICD transfected cells compared with 13% of controls and 6% of NICD transfected cells). These results strongly suggest that MNB/DYRK1A suppresses NOTCH signaling by acting downstream of NICD.

We previously found that transfection with DeltaDN, a truncated form of DELTA that acts as a dominant-negative suppressor of NOTCH signaling in a cell-autonomous manner (Sun and Artavanis-Tsakonas, 1996), was sufficient to induce neuronal differentiation in the NZ (Hämmerle and Tejedor, 2007). Given the capacity of MNB/DYRK1A to suppress NOTCH signaling, we hypothesized that MNB/DYRK1A could be required for the neuronal differentiation induced by inhibiting NOTCH signaling. Accordingly, we tested whether harmine could inhibit the neuronal differentiation induced by DeltaDN. We found that exposure to harmine of DeltaDN transfected embryos strongly precluded the expression of the neuronal marker TUJ1 (15% versus 30% in controls: Fig. 6A). Thus, we concluded that the differentiation induced by the decrease of NOTCH signaling requires MNB/DYRK1A kinase function. Furthermore, the incubation of non-transfected embryos with harmine significantly reduced the proportion of endogenous TUJ1-expressing cells (6% versus 10% in untreated: Fig. 6B-D) indicating that MNB/DYRK1A kinase function is required for neuronal differentiation.

### Transient but not maintained GoF of MNB/DYRK1A induces neuronal differentiation

As MNB/DYRK1A induces cell cycle exit and suppresses NOTCH signaling, we tested whether MNB/DYRK1A expression might be sufficient to induce neuronal differentiation. The ectopic expression of MNB/DYRK1A in the NZ moderately increased TUJ1 expression (20% versus 7% in controls: Fig. 6E,F,J). However, the proportion of TUJ1-expressing cells (20%) among MNB/DYRK1A transfected cells was clearly lower than that of p27KIP1 expressing cells (44%; compare Fig. 2O with Fig. 6J),

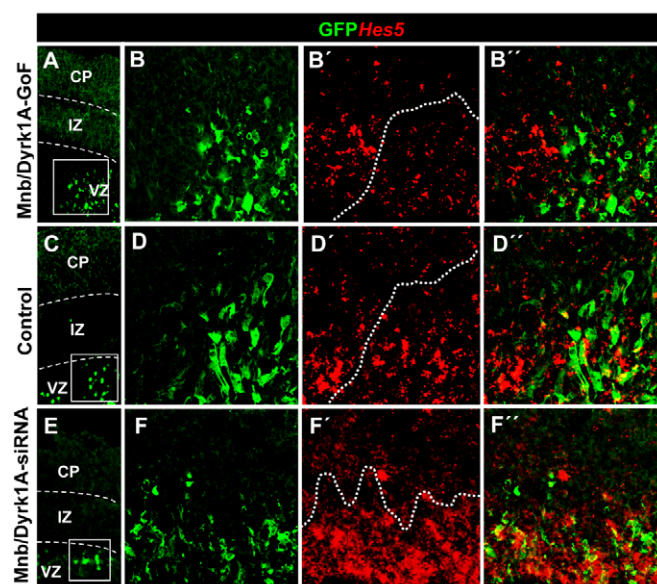

**Fig. 4. Effects of the loss and gain of *Mnb/Dyrk1a* function on *Hes5* expression in the mouse telencephalon.** (A,C,E) Coronal confocal sections showing GFP-expressing cells at the frontal area of the developing cerebral cortex of E14.5 embryos electroporated with pCIG-*Mnb/Dyrk1a* (*Mnb/Dyrk1a* GoF), pCIG (control) or *Mnb/Dyrk1a* siRNA + pCIG (*Mnb/Dyrk1a* LoF), and cultured for 24 hours afterwards. (B-B',D-D',F-F') High-magnification images taken from the boxed areas indicated in A,C,E showing fluorescent in situ hybridization labeling for *Hes5* and GFP immunolabeling. Note the decrease in the number of *Hes5*-positive cells within the transfected region (dotted line) after *Mnb/Dyrk1a* GoF (B-B'), and the increase of *Hes5* expression after *Mnb/Dyrk1a* LoF (F-F'), when compared with the control (D-D') and with the neighboring non-transfected areas. CP, cortical plate; IZ, intermediate zone; VZ, ventricular zone.

indicating that only a small part of the cells that exited the cell cycle due to MNB/DYRK1A expression began to differentiate. As the time required for TUJ1 expression (i.e. the beginning of neuronal differentiation) must be longer than that for p27KIP1 expression (i.e. cell cycle exit), we repeated the experiment but analyzing the cells 36 hours after transfection (instead of 18 hours). After this longer time period, the ratio of TUJ1-positive cells did not increase and the ratio of p27KIP1 positive cells did not decrease (see Fig. S4A,B in the supplementary material). Furthermore, we did not find indications of increased cell death in the MNB/DYRK1A-transfected cells (see Fig. S4C in the supplementary material). Together, these results indicate that only a small proportion of the cells that stop proliferating in response to the GoF of *Mnb/Dyrk1a* by upregulating *p27<sup>KIP1</sup>* expression, subsequently differentiate.

These data suggest that MNB/DYRK1A causes the precursors to withdraw from the cell cycle while keeping them in a quiescent state prior to their differentiation. Indeed, co-transfection with *Mnb/Dyrk1a* induced a significant decrease in the proportion of TUJ1-positive cells generated by *DeltaDN* (Fig. 6G,J), without altering the proportion of p27KIP1-positive cells induced by MNB/DYRK1A (not shown). Interestingly, TUJ1 expression was also strongly suppressed when we co-transfected *Mnb/Dyrk1a* with *Delta1* (Fig. 6H-J), indicating that MNB/DYRK1A blocked the transition from cell cycle exit to differentiation when this was

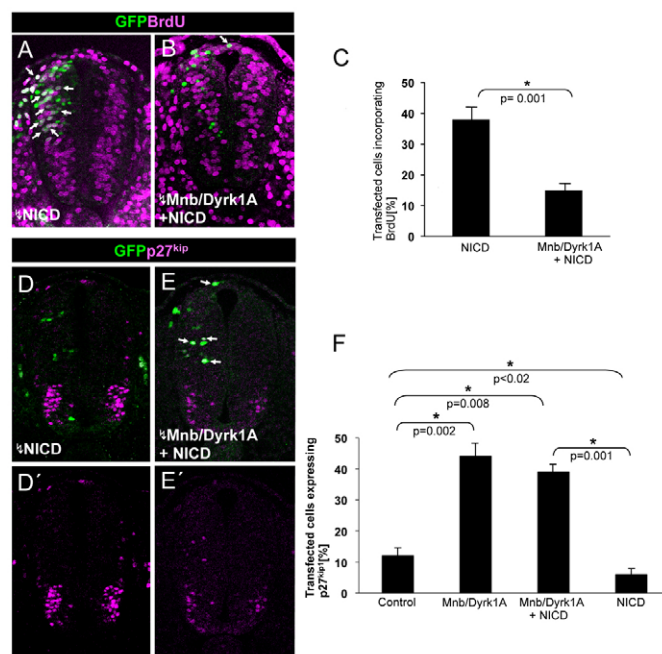

**Fig. 5. The effects of the interaction of MNB/DYRK1A with NOTCH signaling on neural proliferation.** (A,B) Confocal projections (10  $\mu$ m) showing immunolabeling for BrdU and GFP at the level of the spinal cord NZ of HH15-16 chick embryos that were transfected with pEVRF-NICD or pCIG-*Mnb/Dyrk1a* + pEVRF-NICD. (C) Statistical analysis of the results from this experiment. Although NICD strongly suppresses neuronal differentiation in the spinal cord (Hämmerle and Tejedor, 2007), the proportion of control (pCIG) transfected cells that differentiate at this stage is rather low (7%, control in Fig. 6J) and, accordingly, NICD produced only a slight increase of BrdU incorporation over control transfected cells (compare with control in Fig. 1C). Data are mean  $\pm$  s.e.m. (D,E) Confocal projections (10  $\mu$ m) showing immunolabeling for p27KIP1 and GFP at the level of the spinal cord NZ of HH15-16 chick embryos that were transfected with pEVRF-NICD or pCIG-*Mnb/Dyrk1a* + pEVRF-NICD. (F) Statistical analysis of the effect on *p27<sup>KIP1</sup>* expression in the spinal cord NZ of HH15-16 chick embryos transfected with: pCIG (control); pCIG-*Mnb/Dyrk1a*; pCIG-*Mnb/Dyrk1a* + pEVRF-NICD; pEVRF-NICD. Both MNB/DYRK1A alone or with NICD greatly increases the proportion of p27KIP1-positive cells, whereas NICD alone significantly decreases the number of cells expressing p27KIP1 compared with the control. Data are mean  $\pm$  s.e.m.

induced by both lateral inhibition (DELTA1) and cell-autonomous suppression of NOTCH signaling (DeltaDN). These findings strongly suggest that MNB/DYRK1A may block the transition from cell cycle exit to differentiation by maintaining the cells in a quiescent state. This could explain the weak effect that the *Mnb/Dyrk1a* GoF alone had on neuronal differentiation (Fig. 6E,J), although it does not fit readily with the clear requirement of the MNB/DYRK1A kinase for neuronal differentiation (Fig. 6A-D). Although intriguing, this finding is not completely surprising as previous studies on neural cell lines have found that the transient expression or activation of MNB/DYRK1A induced neuronal differentiation (Yang et al., 2001; Kelly and Rahmani, 2005), whereas its stable overexpression impaired differentiation (Park et al., 2007). The pattern of MNB/DYRK1A expression in the embryonic telencephalon of mice may provide some clues to resolve this apparent contradiction. We have previously shown that

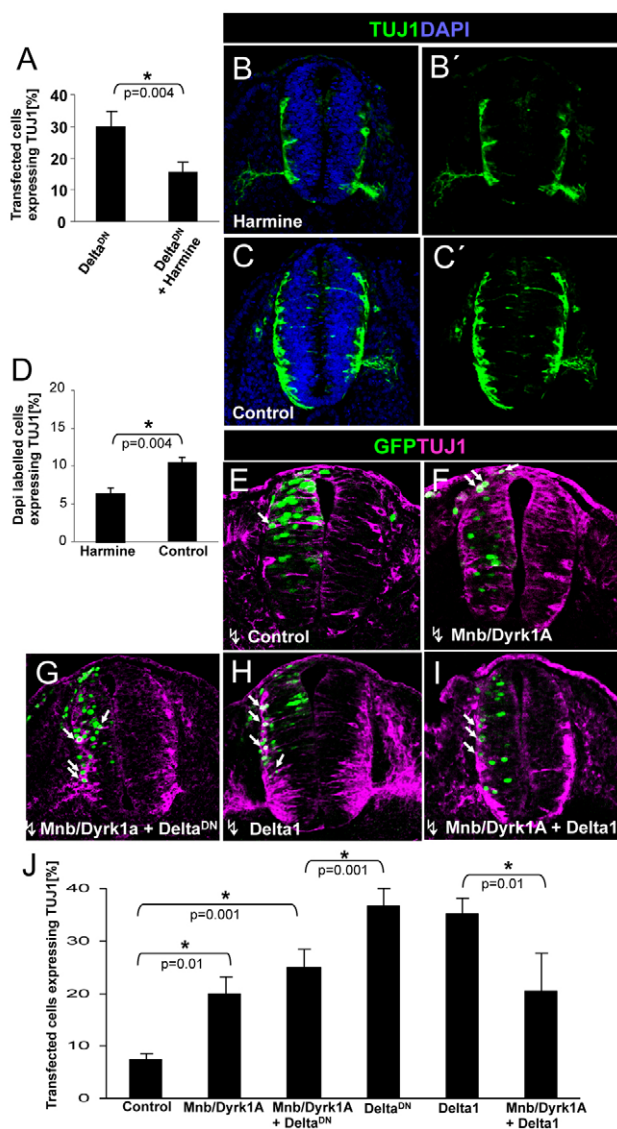

**Fig. 6. Effects of MNB/DYRK1A LoF or GoF on neuronal differentiation induced by the suppression of NOTCH signaling.** (A) HH11-12 embryos were transfected with pCIG-DeltaDN in the NZ and, after 3 hours in ovo, embryos were cultured in the presence or absence of harmine for 15 hours. Data are mean $\pm$ s.e.m. (B-C') Representative images showing TUJ1 immunolabeling and DAPI counterstaining in sections of the rostral spinal cord from HH11-12 embryos that were cultured for 12 hours in the presence or absence of harmine. (D) Quantitative analysis of this experiment. Data are mean $\pm$ s.e.m. (E-I) Representative images showing TUJ1 immunolabeling and GFP in sections of the rostral spinal cord from HH11-12 embryos that were transfected with the pCIG vector carrying the cDNAs indicated, and analyzed 18 hours afterwards. Arrows indicate the transfected cells expressing TUJ1. (J) Statistical analysis of the effect of the indicated constructs on TUJ1 expression in the NZ. Data are mean $\pm$ s.e.m.

MNB/DYRK1A was frequently co-expressed with p27KIP1 in cells located in apical positions of the VZ, whereas it was mostly absent from TUJ1-positive cells in basal positions (Hämmerle et al., 2008). This suggests that MNB/DYRK1A is expressed in prospective neurons as they exit the cell cycle, and that it is

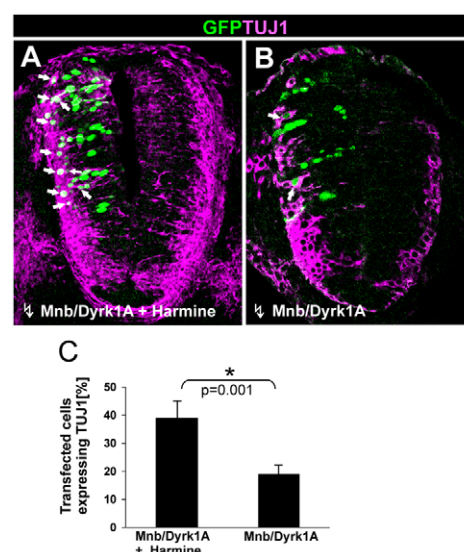

**Fig. 7. Effect of the transient (ON/OFF) MNB/DYRK1A GoF on neuronal differentiation.** (A,B) Confocal projections (10  $\mu$ m) of transverse sections from the spinal cord NZ in HH11-12 chick embryos that were transfected with pCIG-Mnb/Dyrk1a and, after 24 hours in ovo, cultured for 6 hours in the presence or absence of harmine as indicated. Arrows indicate GFP/TUJ1 double-labeled cells. (C) Statistical analysis of the data from this experiment. Note the important increase in the ratio TUJ1-positive cells that was achieved when MNB/DYRK1A transfection was followed by harmine treatment. Data are mean $\pm$ s.e.m.

downregulated as these newborn neurons begin to differentiate and migrate out of the VZ. Accordingly, we hypothesized that the upregulation of *Mnb/Dyrk1a* expression drives the neuronal precursors out of the cell cycle and that *Mnb/Dyrk1a* expression is then down-regulated to allow these cells to differentiate. Thus, when *Mnb/Dyrk1a* was expressed under the control of an exogenous promoter, there was no downregulation of *Mnb/Dyrk1a* and the transition to differentiation was blocked after cell cycle exit.

To test this hypothesis, we designed a transient (ON/OFF) GoF experiment aimed at inhibiting MNB/DYRK1A kinase activity some time after inducing *Mnb/Dyrk1a* expression by transfection. We first assessed the effects of this protocol in PC12 cells, a suitable model for neuronal differentiation. Thus, PC12 cells were transfected with *Mnb/Dyrk1a* and the effects of inhibiting MNB/DYRK1A activity with harmine on TUJ1 expression were analyzed at different times after transfection. Significantly, the addition of harmine 24 hours after transfection of MNB/DYRK1A strongly enhanced TUJ1 labeling (see Fig. S5 in the supplementary material), in contrast to the lack of effect when harmine was added immediately after transfection (not shown). These results stimulated us to employ the same approach in the embryonic chick spinal cord. Accordingly, chick embryos were transfected with *Mnb/Dyrk1a* and, after 24 hours, the transfected embryos were cultured in the presence or absence of harmine for 6 hours before testing TUJ1 expression. We found that exposure to harmine induced a strong increase of TUJ1 expression in *Mnb/Dyrk1a* transfected cells (39% versus 20% in untreated/transfected embryos; Fig. 7). Thus, we concluded that the transient (ON/OFF) GoF of *Mnb/Dyrk1a* is sufficient to promote cell cycle exit and the onset of neuronal differentiation.

## DISCUSSION

### MNB/DYRK1A promotes cell cycle exit of neuronal precursors by upregulating $p27^{KIP1}$ expression

Regulation of the cell cycle exit of neural precursor appears to be crucial for correct neurogenesis. Thus, it is well known that during nervous system development, several key factors that regulate cell cycle progression influence neural cell fate and conversely, several cell determination factors regulate the cell cycle. Furthermore, important cell fate decisions appear to be taken by precursor cells during their last cell cycle (for reviews, see Bally-Cuif and Hammerschmidt, 2003; Cremisi et al., 2003; Ohnuma and Harris, 2003; Nguyen et al., 2006a).

We have shown here that MNB/DYRK1A is necessary and sufficient to induce the expression of  $p27^{KIP1}$  in nascent neurons.  $p27^{KIP1}$  belongs to the Cip/Kip family of CKIs that bind to and inhibit the cyclin/cyclin-dependent kinases (CDKs) complex that control G1/S transition, playing a crucial role in regulating cell cycle exit (for a review, see Sherr and Roberts, 1999). Thus,  $p27^{KIP1}$  expression has been associated with controlling the timing of the birth of mammalian cortical neurons (Caviness et al., 2003; Lukaszewicz et al., 2005). Indeed,  $p27^{KIP1}$  LoF increases cell proliferation and causes brain hyperplasia (Fero et al., 1996), as well as the increased production of late-born neurons (Goto et al., 2004). Thus, the induction of  $p27^{KIP1}$  together with the effects of the *Mnb/Dyrk1a* LoF and GoF in proliferation, fit with the idea that MNB/DYRK1A promotes the cell cycle exit of CNS neurons by upregulating the expression of  $p27^{KIP1}$ . The fact that harmine inhibits  $p27^{KIP1}$  expression strongly suggests that the protein kinase activity of MNB/DYRK1A is required for this function. Post-translational phosphorylation of  $p27^{KIP1}$  by different kinases is crucial for cell cycle regulation (Sherr and Roberts, 1999). For example, MIRK/DYRK1B, the closest MNB/DYRK1A homologue, phosphorylates  $p27^{KIP1}$ , which regulates its stability/activity in tumor cells (Deng et al., 2004). By contrast, MNB/DYRK1A regulates the expression of  $p27^{KIP1}$  at transcriptional level. The known capacity of the MNB/DYRK1A kinase to translocate to the nucleus and to phosphorylate several transcription factors (for reviews, see Galceran et al., 2003; Tejedor and Hämmerle, 2011) can explain this action. Nevertheless, the mechanism downstream of the MNB/DYRK1A kinase involved in this regulation remains to be elucidated.

It has been recently reported that the overexpression of MNB/DYRK1A inhibits proliferation of neural progenitors derived from human embryonic stem cells (Park et al., 2010) and in the developing mouse cerebral cortex (Yabut et al., 2010) through p53 phosphorylation followed by induction of p53 target genes (e.g.  $p21^{CIP1}$ ) (Park et al., 2010) and by the nuclear export and degradation of Cyclin D1 (Yabut et al., 2010). Although the biological relevance of these two mechanisms for the regulation of the end of progenitor proliferation remain to be demonstrated by LoF experiments, it is possible that they can co-exist with the mechanism that we have here shown (i.e.  $p27^{KIP1}$  expression). For example, CyclinD1 and  $p27^{KIP1}$  (and  $p21^{CIP1}$ ) are positive and negative regulators of the G1/S phase transition, respectively. Thus, MNB/DYRK1A may act bi-directionally to ensure the precise timing of cell cycle exit, promoting  $p27^{KIP1}$  (and  $p21^{CIP1}$ ) expression and downregulating cyclin D1. Nevertheless, the fact that MNB/DYRK1A induced  $p27^{KIP1}$  expression in only a subset of neural precursors, indicates that different mechanisms might operate in different neural progenitor populations.

### MNB/DYRK1A suppresses NOTCH signaling for neuronal differentiation

As mentioned above, the canonical NOTCH signaling (i.e. DELTA-NOTCH lateral inhibition) is used in vertebrate neuroepithelia to maintain a pool of progenitors (those cells receiving NOTCH signal) and to select a subset of cells (those upregulating *Delta1* expression) that will differentiate into neurons. In this manner, NOTCH signaling controls the balance between neurogenic progenitors and neuronal precursors, permitting the stepwise specification of distinct neuronal populations during development. Thus, the loss of NOTCH signaling results in precocious neurogenesis at the expense of maintaining progenitor cells and, conversely, activation of NOTCH signaling (with NICD) inhibits neurogenesis and maintains progenitor proliferation (for reviews, see Lewis, 1998; Yoon and Gaiano, 2005; Louvi and Artavanis-Tsakonas, 2006; Kageyama et al., 2009).

We have shown here that MNB/DYRK1A suppresses NOTCH signaling in a cell-autonomous manner and that the MNB/DYRK1A kinase is required for the neuronal differentiation induced by the suppression of NOTCH signaling. These findings strongly suggest that the MNB/DYRK1A kinase plays a key role in neuronal differentiation by negatively regulating NOTCH signaling in CNS neuronal precursors. Interestingly, MNB/DYRK1A upregulates *Delta1* expression, although we do not know whether this is a direct effect of MNB/DYRK1A or if it is caused indirectly through the suppression of NOTCH signaling. In any case, the consequence is that MNB/DYRK1A could enhance the differences in the levels of *Delta1* expression among neighboring cells, thereby amplifying the lateral inhibition feedback process and facilitating neuronal specification of the DELTA1-positive/NOTCH-signal-suppressed cell.

In addition, our finding that MNB/DYRK1A precludes the pro-proliferative effects of NICD in the chick spinal cord is, in principle, compatible with the mechanism proposed by Fernandez-Martinez et al. that MNB/DYRK1A attenuates NOTCH signaling by phosphorylating the NICD in cell lines. Nevertheless, further studies must be performed in the CNS, to define the molecular mechanisms underlying the inhibition of NOTCH signaling by the MNB/DYRK1A kinase.

### MNB/DYRK1A couples cell cycle exit to neuronal differentiation

A complete account of the process of neurogenesis comprises several sequential cellular steps. Initially, neural progenitors (NPs) proliferate (self-replicate) through proliferative divisions. Afterwards, they begin to divide in a neurogenic manner, giving rise to a new NP and a precursor cell that exits the cycle and differentiates as a neuron (for reviews, see Caviness et al., 2003; Götz and Huttner, 2005; Agathocleous and Harris, 2009; Okano and Temple, 2009). These sequential steps need to be coordinated in order to generate the correct number and type of neurons at the right place and time. Thus, cell cycle exit must be precisely coupled to terminal differentiation (Caviness et al., 2003; Cremisi et al., 2003; Ohnuma and Harris, 2003; Nguyen et al., 2006a; Pitto and Cremisi, 2010). Several studies have shown that cell cycle exit is insufficient to trigger neuronal differentiation of neuronal progenitors (Garcia-Dominguez et al., 2003; Gui et al., 2007; Bel-Vialar et al., 2007; Hämmerle and Tejedor, 2007). For example, we previously found that suppressing NOTCH signaling in preneurogenic progenitors in the so called transition zone of the prospective spinal cord of early chick embryos arrested proliferation but it did not elicit neuronal differentiation. By

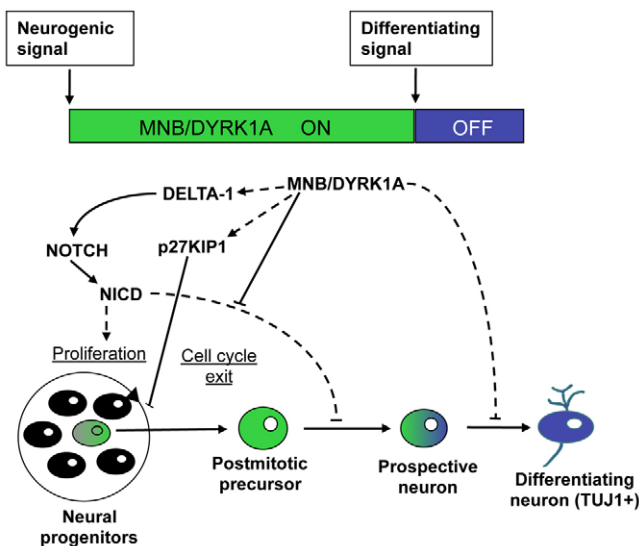

**Fig. 8. A working model: MNB/DYRK1A functions as a binary switch in the coupling of cell cycle exit and neuronal differentiation.** During neurogenesis, NOTCH signaling maintains neural progenitors in proliferation and inhibits neuronal differentiation. MNB/DYRK1A is transiently (ON/OFF) expressed in single neuronal precursors. The upregulation of MNB/DYRK1A expression (ON phase, presumably caused by neurogenic signals) promotes cell cycle exit by upregulating p27KIP1 expression. In addition, MNB/DYRK1A suppresses NOTCH signaling and upregulates *Delta1* expression, which increases NOTCH signaling in the neighboring cells and reinforces the feedback loop of lateral inhibition, thereby facilitating the generation of prospective neurons that remain in a quiescent state while MNB/DYRK1A expression level is high. Subsequently, MNB/DYRK1A is downregulated (OFF phase, presumably caused by differentiating signals), allowing the prospective neuron to differentiate.

contrast, similar suppression in the NZ efficiently induced neuronal differentiation once the rostrocaudal wave of differentiation had reached that region (Hämmerle and Tejedor, 2007). Similarly, it was shown that *Pax6* upregulation is sufficient to push neural progenitors toward cell cycle exit. Nevertheless, these neuronal precursors fail to perform neuronal differentiation until *Pax6* is turned off (Bel-Vialar et al., 2007).

Evidence from several experimental systems points to various sequential functions of MNB/DYRK1A in CNS development at the transition from proliferation to neuronal differentiation (for a review, see Tejedor and Hämmerle, 2011). Thus, we have previously shown that *Mnb/Dyrk1a* is transiently expressed in preneurogenic NPs of the chick spinal cord at the transition from proliferative to neurogenic divisions and it is asymmetrically segregated during cell division into one of the daughter cells (Hämmerle et al., 2002). These data suggest that MNB/DYRK1A may act as a cell determinant of neurogenesis. Accordingly, neural stem cells from *Dyrk1a*<sup>+/-</sup> mice exhibit defects in self-renewal (Ferrón et al., 2010).

We have shown here that subsequent to the mentioned expression in preneurogenic NPs, *Mnb/Dyrk1a* is again transiently expressed in prospective neurons. We propose that this second transient (ON/OFF) expression of MNB/DYRK1A functions as a binary switch to couple the end of proliferation, through the upregulation of *p27KIP1* expression, with the initiation of neuronal differentiation by negatively regulating NOTCH signaling (see Fig. 8 for a schematic model). Furthermore, our experiments support

the hypothesis that this transient expression of *Mnb/Dyrk1a* is required in neuronal precursors for the transition from cell cycle exit to neuronal differentiation. Thus, in contrast to the LoF of *p27KIP1* that produces brain hyperplasia in the mouse (Fero et al., 1996) and *Drosophila* (Wallace et al., 2000), *Mnb/Dyrk1a* LoF decreases the number of neurons in both organisms (Tejedor et al., 1995; Fotaki et al., 2002). This can be explained because, as shown here, the *Mnb/Dyrk1a* LoF primarily causes overproliferation during CNS neurogenesis but it also induces extensive apoptosis that eliminates the supernumerary cells, leading to neuronal deficit. This cell death is functionally different from that caused by the LoF of MNB/DYRK1A during retina development, which is mediated by phosphorylation of caspase 9 without effects on proliferation or specification (Laguna et al., 2008). Moreover, the fact that the LoF of MNB/DYRK1A kinase does not induce cell death in differentiating mouse brain neurons (Göckler et al., 2009) suggests that the apoptotic cell death is induced on CNS neuronal precursors when cell cycle exit and neuronal differentiation are uncoupled by the LoF of MNB/DYRK1A.

We hypothesize that the transient (ON/OFF) expression of *Mnb/Dyrk1a* may withdraw neuronal precursors from the cell cycle and keep them in a quiescent state, opening a time window in which they could receive other signals, thereby providing spatiotemporal specificity to the differentiation process. The capacity of MNB/DYRK1A to respond to different signaling pathways (for reviews, see Galceran et al., 2003; Park et al., 2009) makes this scenario possible. It will therefore be important to study in detail the mechanisms regulating the ON/OFF of *Mnb/Dyrk1a* expression and the signaling pathways that interact with MNB/DYRK1A during neurogenesis.

### Possible implications for Down's syndrome

Based on its function in neural proliferation/neurogenesis and its overexpression in the brain of fetuses with DS, *MNB/DYRK1A* has been widely proposed to be involved in the neuronal deficits of DS (for reviews, see Hämmerle et al., 2003a; Dierssen and de Lagrán, 2006; Tejedor and Hämmerle, 2011). Given the function of MNB/DYRK1A in the coupling of cell cycle exit and neuronal differentiation shown here, the overexpression of MNB/DYRK1A in the DS brain could predictably cause premature neurogenesis and depletion of the neural progenitor pool, contributing to neuronal deficit. The overexpression of MNB/DYRK1A could also alter neurogenesis by increasing p27KIP1 levels in progenitor cells as the overexpression of p27KIP1 can extend the G1 phase in mouse cortical progenitors (Mitsunashi et al., 2001). Indeed, such lengthening was found to be sufficient to induce the switch from proliferative to neurogenic divisions (Calegari et al., 2005). Strikingly, a brain hyperplasia phenotype has been reported for a (YAC) transgenic mouse model of partial trisomy 21 overexpressing five human genes, one of them MNB/DYRK1A (Branchi et al., 2004; Sebríe et al., 2008). However, transgenic mice overexpressing only MNB/DYRK1A do not exhibit such brain alterations (Altafaj et al., 2001). Thus, further work with other DS experimental models will be required to assess the involvement of MNB/DYRK1A in the neuronal deficit of DS.

### Acknowledgements

We are very grateful to Emilie Pacary for the help with ex vivo electroporation, to C. Papadopoulos for the help with PC12 cell culture and to members of our labs for interesting discussions. We thank E. Llorens for expert technical assistance. This work was supported by Deutsche Forschungsgemeinschaft grants (BE 1967/2-1) to W.B. and (SFB-870) J.G., by a grant in aid from the Medical Research Council (U117570528) to F.G., by grants from the Spanish

Ministry of Science and Innovation, the Generalitat Valenciana and the Fundaci3n Innocente Innocente to F.J.T., and by a joint grant from the Fundaci3n Jer3me Lejeune to W.B. and F.J.T. B.H. was recipient of two Travel-Fellowships of the Generalitat Valenciana. We are indebted to M. L. Montesinos for critically reading the manuscript. Deposited in PMC for release after 6 months.

# Competing interests statement

The authors declare no competing financial interests.

# Supplementary material

Supplementary material for this article is available at

<http://dev.biologists.org/lookup/suppl/doi:10.1242/dev.066167/-DC1>

# References

- Adayev, T., Chen-Hwang, M. C., Murakami, N., Wegiel, J. and Hwang, Y. W. (2006). Kinetic properties of a MNB/DYRK1A mutant suitable for the elucidation of biochemical pathways. *Biochemistry* **45**, 12011-12019.
- Agathocleous, M. and Harris, W. A. (2009). From progenitors to differentiated cells in the vertebrate retina. *Annu. Rev. Cell Dev. Biol.* **25**, 45-69.
- Akazawa, C., Sasai, Y., Nakanishi, S. and Kageyama, R. (1992). Molecular characterization of a rat negative regulator with a basic helix-loop-helix structure predominantly expressed in the developing nervous system. *J. Biol. Chem.* **267**, 21879-21885.
- Altajaf, X., Dierssen, M., Baamonde, C., Marti, E., Visa, J., Guimerà, J., Oset, M., González, J. R., Flórez, J., Fillat, C. et al. (2001). Neurodevelopmental delay, motor abnormalities and cognitive deficits in transgenic mice overexpressing Dyrk1A (minibrain), a murine model of Down's syndrome. *Hum. Mol. Genet.* **10**, 1915-1923.
- Bain, J., McLauchlan, H., Elliott, M. and Cohen, P. (2003). The specificities of protein kinase inhibitors: an update. *Biochem. J.* **371**, 199-204.
- Bain, J., Plater, L., Elliott, M., Shpiro, N., Hastie, C. J., McLauchlan, H., Klevernic, I., Arthur, J. S., Alessi, D. R. and Cohen, P. (2007). The selectivity of protein kinase inhibitors: a further update. *Biochem. J.* **408**, 297-315.
- Bally-Cuif, L. and Hammerschmidt, M. (2003). Induction and patterning of neuronal development, and its connection to cell cycle control. *Curr. Opin. Neurobiol.* **13**, 16-25.
- Becker, E. B. and Bonni, A. (2004). Cell cycle regulation of neuronal apoptosis in development and disease. *Prog. Neurobiol.* **72**, 1-25.
- Becker, L., Mito, T., Takashima, S. and Onodera, K. (1991). Growth and development of the brain in Down Syndrome. *Prog. Clin. Biol. Res.* **373**, 133-152.
- Becker, W. and Sippl, W. (2011). Activation, regulation, and inhibition of DYRK1A. *FEBS J.* **278**, 246-256.
- Becker, W., Weber, Y., Wetzel, K., Eirnbter, K., Tejedor, F. J. and Joost, H. G. (1998). Sequence characteristics, subcellular localization, and substrate specificity of DYRK-related kinases, a novel family of dual specificity protein kinases. *J. Biol. Chem.* **273**, 25893-25902.
- Bel-Vialar, S., Medevielle, F. and Pituello, F. (2007). The on/off of Pax6 controls the tempo of neuronal differentiation in the developing spinal cord. *Dev. Biol.* **305**, 659-673.
- Branchi, I., Bichler, Z., Minghetti, L., Delabar, J. M., Malchiodi-Albedi, F., Gonzalez, M. C., Chettouh, Z., Nicolini, A., Chabert, C., Smith, D. J. et al. (2004). Transgenic mouse in vivo library of human Down syndrome critical region 1, association between DYRK1A overexpression, brain development abnormalities, and cell cycle protein alteration. *J. Neuropathol. Exp. Neurol.* **63**, 429-440.
- Calegari, F., Haubensak, W., Haffner, C. and Huttner, W. B. (2005). Selective lengthening of the cell cycle in the neurogenic subpopulation of neural progenitor cells during mouse brain development. *J. Neurosci.* **25**, 6533-6538.
- Caviness, V. S., Jr, Goto, T., Tarui, T., Takahashi, T., Bhide, P. G. and Nowakowski, R. S. (2003). Cell output, cell cycle duration and neuronal specification: a model of integrated mechanisms of the neocortical proliferative process. *Cereb. Cortex.* **13**, 592-598.
- Chakrabarti, L., Galdzicki, Z. and Haydar, T. F. (2007). Defects in embryonic neurogenesis and initial synapse formation in the forebrain of the Ts65Dn mouse model of Down syndrome. *J. Neurosci.* **27**, 11483-11495.
- Chitnis, A., Henrique, D., Lewis, J., Ish-Horowitz, D. and Kintner, C. (1995). Primary neurogenesis in Xenopus embryos regulated by a homologue of the Drosophila neurogenic gene Delta. *Nature* **375**, 761-766.
- Contestabile, A., Fila, T., Ceccarelli, C., Bonasoni, P., Bonapace, L., Santini, D., Bartsaghi, R. and Ciani, E. (2007). Cell cycle alteration and decreased cell proliferation in the hippocampal dentate gyrus and in the neocortical germinal matrix of fetuses with Down syndrome and in Ts65Dn mice. *Hippocampus* **17**, 665-678.
- Coyle, J. T., Oster-Granite, M. L. and Gearhart, J. D. (1986). The neurobiologic consequences of Down syndrome. *Brain Res. Bull.* **16**, 773-787.
- Cremisi, F., Philpott, A. and Ohnuma, S. (2003). Cell cycle and cell fate interactions in neural development. *Curr. Opin. Neurobiol.* **13**, 26-33.
- Delabar, J. M., Theophile, D., Rahmani, Z., Chettouh, Z., Blouin, J. L., Prieur, M., Noel, B. and Sinet, P. M. (1993). Molecular mapping of twenty-four features of Down syndrome on chromosome 21. *Eur. J. Hum. Genet.* **1**, 114-124.
- Deng, X., Mercer, S. E., Shah, S., Ewton, D. Z. and Friedman, E. (2004). The cyclin-dependent kinase inhibitor p27Kip1 is stabilized in G(0) by Mirk/dyrk1B kinase. *J. Biol. Chem.* **279**, 22498-22504.
- Dierssen, M. and de Lagrán, M. M. (2006). DYRK1A (dual-specificity tyrosine-phosphorylated and -regulated kinase 1A): a gene with dosage effect during development and neurogenesis. *Scientific World Journal* **6**, 1911-1922.
- Diez del Corral, R. and Storey, K. G. (2004). Opposing FGF and retinoid pathways: a signalling switch that controls differentiation and patterning onset in the extending vertebrate body axis. *Bioessays* **26**, 857-869.
- Ericson, J., Thor, S., Edlund, T., Jessell, T. M. and Yamada, T. (1992). Early stages of motor neuron differentiation revealed by expression of homeobox gene Islet-1. *Science* **256**, 1555-1560.
- Fernandez-Martinez, J., Vela, E. M., Tora-Ponsioen, M., Ocaña, O. H., Nieto, M. A. and Galceran, J. (2009). Attenuation of Notch signalling by the Down-syndrome-associated kinase DYRK1A. *J. Cell Sci.* **122**, 1574-1583.
- Fero, M. L., Rivkin, M., Tasch, M., Porter, P., Carow, C. E., Firpo, E., Polyak, K., Tsai, L. H., Broudy, V., Perlmutter, R. M. et al. (1996). A syndrome of multiorgan hyperplasia with features of gigantism, tumorigenesis, and female sterility in p27(Kip1) deficient mice. *Cell* **85**, 733-744.
- Ferrón, S. R., Pozo, N., Laguna, A., Aranda, S., Porlan, E., Moreno, M., Fillat, C., de la Luna, S., Sánchez, P., Arbones, M. L. et al. (2010). Regulated segregation of Kinase Dyrk1A during asymmetric neural stem cell division is critical for EGFR-mediated biased signaling. *Cell Stem Cell* **7**, 367-379.
- Fior, R. and Henrique, D. (2005). A novel hes5/hes6 circuitry of negative regulation controls Notch activity during neurogenesis. *Dev. Biol.* **281**, 318-333.
- Fotaki, V., Dierssen, M., Alcantara, S., Martinez, S., Marti, E., Casas, C., Visa, J., Soriano, E., Estivill, X. and Arbones, M. L. (2002). Dyrk1A haploinsufficiency affects viability and causes developmental delay and abnormal brain morphology in mice. *Mol. Cell. Biol.* **22**, 6636-6647.
- Funakoshi, E., Hori, T., Haraguchi, T., Hiraoka, Y., Kudoh, J., Shimizu, N. and Ito, F. (2003). Overexpression of the human MNB/DYRK1A gene induces formation of multinucleate cells through overduplication of the centrosome. *BMC Cell Biol.* **4**, 12.
- Galceran, J., de Graaf, K., Tejedor, F. J. and Becker, W. (2003). The MNB/DYRK1A protein kinase: genetic and biochemical properties. *J. Neural Transm.* **67 Suppl.**, 139-148.
- García-Domínguez, M., Poquet, C., Garel, S. and Charnay, P. (2003). Ebf gene function is required for coupling neuronal differentiation and cell cycle exit. *Development* **130**, 6013-6025.
- Göckler, N., Jofre, G., Papadopoulos, C., Soppa, U., Tejedor, F. J. and Becker, W. (2009). Harmine specifically inhibits protein kinase DYRK1A and interferes with neurite formation. *FEBS J.* **276**, 6324-6337.
- Goto, T., Mitsuhashi, T. and Takahashi, T. (2004). Altered patterns of neuron production in the p27 knockout mouse. *Dev. Neurosci.* **26**, 208-217.
- Götz, M. and Huttner, W. B. (2005). The cell biology of neurogenesis. *Nat. Rev. Mol. Cell Biol.* **6**, 777-788.
- Guedj, F., Sébrié, C., Rivals, I., Ledru, A., Paly, E., Bizot, J. C., Smith, D., Rubin, E., Gillet, B., Arbones, M. et al. (2009). Green tea polyphenols rescue of brain defects induced by overexpression of DYRK1A. *PLoS ONE* **4**, e4606.
- Gui, H., Li, S. and Matise, M. P. (2007). A cell-autonomous requirement for Cip/Kip cyclin-kinase inhibitors in regulating neuronal cell cycle exit but not differentiation in the developing spinal cord. *Dev. Biol.* **301**, 14-26.
- Guidi, S., Bonasoni, P., Ceccarelli, C., Santini, D., Gualtieri, F., Ciani, E. and Bartsaghi, R. (2008). Neurogenesis impairment and increased cell death reduce total neuron number in the hippocampal region of fetuses with Down syndrome. *Brain Pathol.* **18**, 180-197.
- Guillemot, F. (2005). Cellular and molecular control of neurogenesis in the mammalian telencephalon. *Curr. Opin. Cell Biol.* **17**, 639-647.
- Guillemot, F. (2007). Spatial and temporal specification of neural fates by transcription factor codes. *Development* **134**, 3771-3780.
- Guimerà, J., Casas, C., Pucharcos, C., Solans, A., Domenech, A., Planas, A. M., Ashley, J., Lovett, M., Estivill, X. and Pritchard, M. A. (1996). A human homologue of Drosophila minibrain (MNB) is expressed in the neuronal regions affected in Down syndrome and maps to the critical region. *Hum. Mol. Genet.* **5**, 1305-1310.
- Guimerà, J., Casas, C., Estivill, X. and Pritchard, M. (1999). Human minibrain homologue (MNBH/DYRK1): characterization, alternative splicing, differential tissue expression, and overexpression in Down syndrome. *Genomics* **57**, 407-418.
- Hamburger, V. and Hamilton, H. L. (1951). A series of normal stages in the development of the chick embryo. *J. Morphol.* **88**, 49-92.
- Hämmerle, B. and Tejedor, F. J. (2002). A method for pulse and chase BrdU-labeling of early chick embryos. *J. Neurosci. Methods* **122**, 59-64.
- Hämmerle, B. and Tejedor, F. J. (2007). A novel function of DELTA-NOTCH signalling mediates the transition from proliferation to neurogenesis in neural progenitor cells. *PLoS ONE* **2**, e1169.

- Hämmerle, B., Vera-Samper, E., Speicher, S., Arencibia, R., Martinez, S. and Tejedor, F. J. (2002). Mnb/Dyrk1A is transiently expressed and asymmetrically segregated in neural progenitor cells at the transition to neurogenic divisions. *Dev. Biol.* **246**, 259-273.
- Hämmerle, B., Elizalde, C., Galceran, J., Becker, W. and Tejedor, F. J. (2003a). The MNB/DYRK1A protein kinase: neurobiological functions and Down syndrome implications. *J. Neural Transm.* **67 Suppl.**, 129-137.
- Hämmerle, B., Carnicero, A., Elizalde, C., Ceron, J., Martinez, S. and Tejedor, F. J. (2003b). Expression patterns and subcellular localization of the Down syndrome candidate protein MNB/DYRK1A suggest a role in late neuronal differentiation. *Eur. J. Neurosci.* **17**, 2277-2286.
- Hämmerle, B., Elizalde, C. and Tejedor, F. J. (2008). The spatio-temporal and subcellular expression of the candidate Down syndrome gene Mnb/Dyrk1A in the developing mouse brain suggests distinct sequential roles in neuronal development. *Eur. J. Neurosci.* **27**, 1061-1074.
- Henrique, D., Hirsinger, E., Adam, J., Le Roux, I., Pourquie, O., Ish-Horowicz, D. and Lewis, J. (1997). Maintenance of neuroepithelial progenitor cells by Delta-Notch signaling in the embryonic chick retina. *Curr. Biol.* **7**, 661-670.
- Hollyday, M. (2001). Neurogenesis in the vertebrate neural tube. *Int. J. Dev. Neurosci.* **19**, 161-173.
- Kageyama, R., Ohtsuka, T., Shimojo, H. and Imayoshi, I. (2009). Dynamic regulation of Notch signaling in neural progenitor cells. *Curr. Opin. Cell Biol.* **21**, 733-740.
- Kelly, P. A. and Rahmani, Z. (2005). DYRK1A enhances the mitogen-activated protein kinase cascade in PC12 cells by forming a complex with Ras, B-Raf, and MEK1. *Mol. Biol. Cell* **16**, 3562-3573.
- Laguna, A., Aranda, S., Barallobre, M. J., Barhoum, R., Fernández, E., Fotaki, V., Delabar, J. M., de la Luna, S., de la Villa, P. and Arbonés, M. L. (2008). The protein kinase DYRK1A regulates caspase-9-mediated apoptosis during retina development. *Dev. Cell* **15**, 841-853.
- Larsen, K. B., Laursen, H., Graem, N., Samuelsen, G. B., Bogdanovic, N. and Pakkenberg, B. (2008). Reduced cell number in the neocortical part of the human fetal brain in Down syndrome. *Ann. Anat.* **190**, 421-427.
- Lewis, J. (1998). Notch signalling and the control of cell fate choices in vertebrates. *Semin. Cell Dev. Biol.* **9**, 583-589.
- Louvi, A. and Artavanis-Tsakonas, S. (2006). Notch signalling in vertebrate neural development. *Nat. Rev. Neurosci.* **7**, 93-102.
- Lukaszewicz, A., Savatier, P., Cortay, V., Giroud, P., Huissoud, C., Berland, M., Kennedy, H. and Dehay, C. (2005). G1 phase regulation, area-specific cell cycle control, and cytoarchitectonics in the primate cortex. *Neuron* **47**, 353-364.
- Matthias, P., Müller, M. M., Schreiber, E., Rusconi, S. and Schaffner, W. (1989). Eukaryotic expression vectors for the analysis of mutant proteins. *Nucleic Acids Res.* **17**, 6418.
- Megason, S. G. and McMahon, A. P. (2002). A mitogen gradient of dorsal midline Wnts organizes growth in the CNS. *Development* **129**, 2087-2098.
- Mitsuhashi, T., Aoki, Y., Eksioğlu, Y. Z., Takahashi, T., Bhide, P. G., Reeves, S. A. and Caviness, V. S., Jr (2001). Overexpression of p27Kip1 lengthens the G1 phase in a mouse model that targets inducible gene expression to central nervous system progenitor cells. *Proc. Natl. Acad. Sci. USA* **98**, 6435-6440.
- Moeller, R. S., Kübart, S., Hoeltzenbein, M., Heye, B., Vogel, I., Hansen, C. P., Menzel, C., Ullmann, R., Tommerup, N., Ropers, H. H. et al. (2008). Truncation of the Down syndrome candidate gene DYRK1A in two unrelated patients with microcephaly. *Am. J. Hum. Genet.* **82**, 1165-1170.
- Nguyen, L., Besson, A., Roberts, J. M. and Guillemot, F. (2006a). Coupling cell cycle exit, neuronal differentiation and migration in cortical neurogenesis. *Cell Cycle* **20**, 2314-2318.
- Nguyen, L., Besson, A., Heng, J. I., Schuurmans, C., Teboul, L., Parras, C., Philpott, A., Roberts, J. M. and Guillemot, F. (2006b). p27kip1 independently promotes neuronal differentiation and migration in the cerebral cortex. *Genes Dev.* **20**, 1511-1524.
- Ohnuma, S. and Harris, W. A. (2003). Neurogenesis and the cell cycle. *Neuron* **40**, 199-208.
- Okano, H. and Temple, S. (2009). Cell types to order: temporal specification of CNS stem cells. *Curr. Opin. Neurobiol.* **19**, 112-119.
- Park, J., Yang, E. J., Yoon, J. H. and Chung, K. C. (2007). Dyrk1A overexpression in immortalized hippocampal cells produces the neuropathological features of Down syndrome. *Mol. Cell. Neurosci.* **36**, 270-279.
- Park, J., Song, W. J. and Chung, K. C. (2009). Function and regulation of Dyrk1A: towards understanding Down syndrome. *Cell. Mol. Life Sci.* **66**, 3235-3240.
- Park, J., Oh, Y., Yoo, L., Jung, M. S., Song, W. J., Lee, S. H., Seo, H. and Chung, K. C. (2010). DYRK1A phosphorylates p53 and inhibits proliferation of embryonic neuronal cells. *J. Biol. Chem.* **285**, 31895-31906.
- Pitto, L. and Cremisi, F. (2010). Timing neurogenesis by cell cycle. *Cell Cycle* **9**, 434-435.
- Pituello, F. (1997). Neuronal specification: generating diversity in the spinal cord. *Curr. Biol.* **7**, R701-R704.
- Schmidt-Sidor, B., Wisniewski, K. E., Shepard, T. H. and Sersen, E. A. (1990). Brain growth in Down syndrome subjects 15 to 22 weeks of gestational age and birth to 60 months. *Clin. Neuropathol.* **9**, 181-190.
- Sebrié, C., Chabert, C., Ledru, A., Guedj, F., Po, C., Smith, D. J., Rubin, E., Rivals, I., Beloeil, J. C., Gillet, B. et al. (2008). Increased dosage of DYRK1A and brain volumetric alterations in a YAC model of partial trisomy 21. *Anat. Rec. (Hoboken)* **291**, 254-262.
- Sherr, C. J. and Roberts, J. M. (1999). CDK inhibitors: positive and negative regulators of G1-phase progression. *Genes Dev.* **13**, 1501-1512.
- Sitz, J. H., Baumgärtel, K., Hämmerle, B., Papadopoulos, C., Hekerman, P., Tejedor, F. J., Becker, W. and Lutz, B. (2008). The Down syndrome candidate dual-specificity tyrosine phosphorylation-regulated kinase 1A phosphorylates the neurodegeneration-related septin 4. *Neuroscience* **157**, 596-605.
- Song, W. J., Sternberg, L. R., Kasten-Sportes, C., Keuren, M. L., Chung, S. H., Slack, A. C., Miller, D. E., Glover, T. W., Chiang, P. W., Lou, L. et al. (1996). Isolation of human and murine homologues of the Drosophila minibrain gene: human homologue maps to 21q22.2 in the Down syndrome "critical region". *Genomics* **38**, 331-339.
- Sun, X. and Artavanis-Tsakonas, S. (1996). The intracellular deletions of DELTA and SERRATE define dominant negative forms of the Drosophila Notch ligands. *Development* **122**, 2465-2474.
- Tejedor, F. J. and Hämmerle, B. (2011). MNB/DYRK1A as a multiple regulator of neuronal development. *FEBS J.* **278**, 223-235.
- Tejedor, F., Zhu, X. R., Kaltenbach, E., Ackermann, A., Baumann, A., Canal, I., Heisenberg, M., Fischbach, K. F. and Pongs, O. (1995). *minibrain*: a new protein kinase family involved in postembryonic neurogenesis in *Drosophila*. *Neuron* **14**, 287-301.
- Wallace, K., Liu, T. H. and Vaessin, H. (2000). The pan-neural bHLH proteins DEADPAN and ASENSE regulate mitotic activity and cdk inhibitor dacapo expression in the Drosophila larval optic lobes. *Genesis* **26**, 77-85.
- Wegiel, J., Gong, C. X. and Hwang, Y. W. (2011). The role of DYRK1A in neurodegenerative diseases. *FEBS J.* **278**, 236-245.
- Wiechmann, S., Czajkowska, H., de Graaf, K., Grötzinger, J., Joost, H. G. and Becker, W. (2003). Unusual function of the activation loop in the protein kinase DYRK1A. *Biochem. Biophys. Res. Commun.* **302**, 403-408.
- Wisniewski, K. E., Laure-Kamionowska, M. and Wisniewski, H. M. (1984). Evidence of arrest of neurogenesis and synaptogenesis in brains of patients with Down's syndrome. *N. Engl. J. Med.* **311**, 1187-1188.
- Yabut, O., Domogauer, J. and D'Arcangelo, G. (2010). Dyrk1A overexpression inhibits proliferation and induces premature neuronal differentiation of neural progenitor cells. *J. Neurosci. Mar.* **30**, 4004-4014.
- Yang, E. J., Ahn, Y. S. and Chung, K. C. (2001). Protein kinase Dyrk1 activates cAMP response element-binding protein during neuronal differentiation in hippocampal progenitor cells. *J. Biol. Chem.* **276**, 39819-39824.
- Yoon, K. and Gaiano, N. (2005). Notch signaling in the mammalian central nervous system: insights from mouse mutants. *Nat. Neurosci.* **8**, 709-715.
